# Supplementary material for: Design of hierarchical comb hydrophilic polymer brush (HCHPB) surfaces inspired by fish mucus for anti-biofouling
Source: Royal Society of Chemistry journal article supplement (doi:10.1039/c8tb03278e), 2019-01-01
Supplement: c8tb03278e1.pdf [file c8tb03278e1.pdf]

## Support information

### Designing of Hierarchical Comb Hydrophilic Polymer Brush (HCHPB) Surfaces

#### Inspired by Fish mucus for anti-biofouling

Xin Su<sup>ab</sup>, Dezhao Hao<sup>cd</sup>, Zhengning Li<sup>\*a</sup>, Xinglin Guo<sup>\*b</sup> and Lei Jiang<sup>cd</sup>

- a. College of Environmental and Chemical Engineering, Dalian University, Dalian 116622, China.
- b. Beijing National Laboratory for Molecular Sciences (BNLMS), Key Laboratory of Green Printing, Institute of Chemistry, Chinese Academy of Sciences, Beijing 100190, P. R. China.
- c. Technical Institute of Physics and Chemistry, Chinese Academy of Sciences, Beijing 100190, P. R. China.
- d. School of Future Technology, University of Chinese Academy of Sciences, Beijing, 100190, P. R. China

## Support information 1

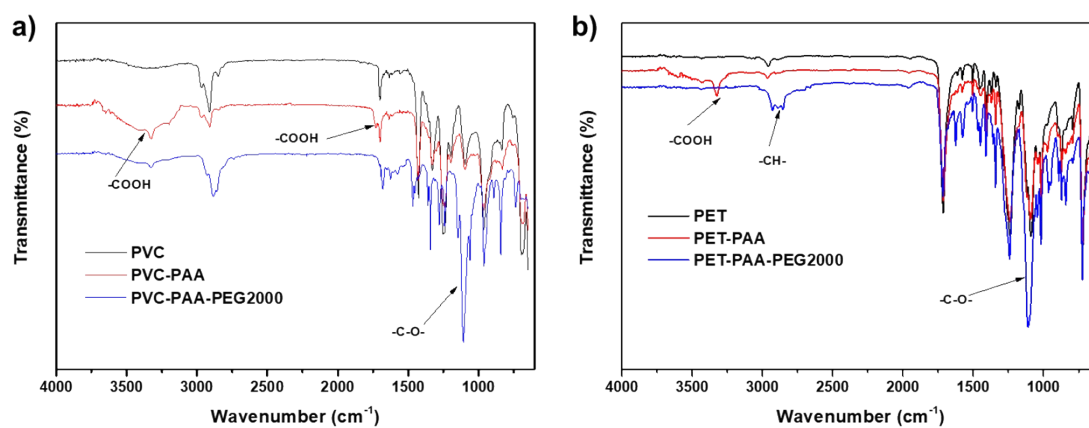

**Fig. S1** Identification for modified substrate. FTIR-ATR spectra of a) PVC membranes and b) PET membranes.

## Support information 2

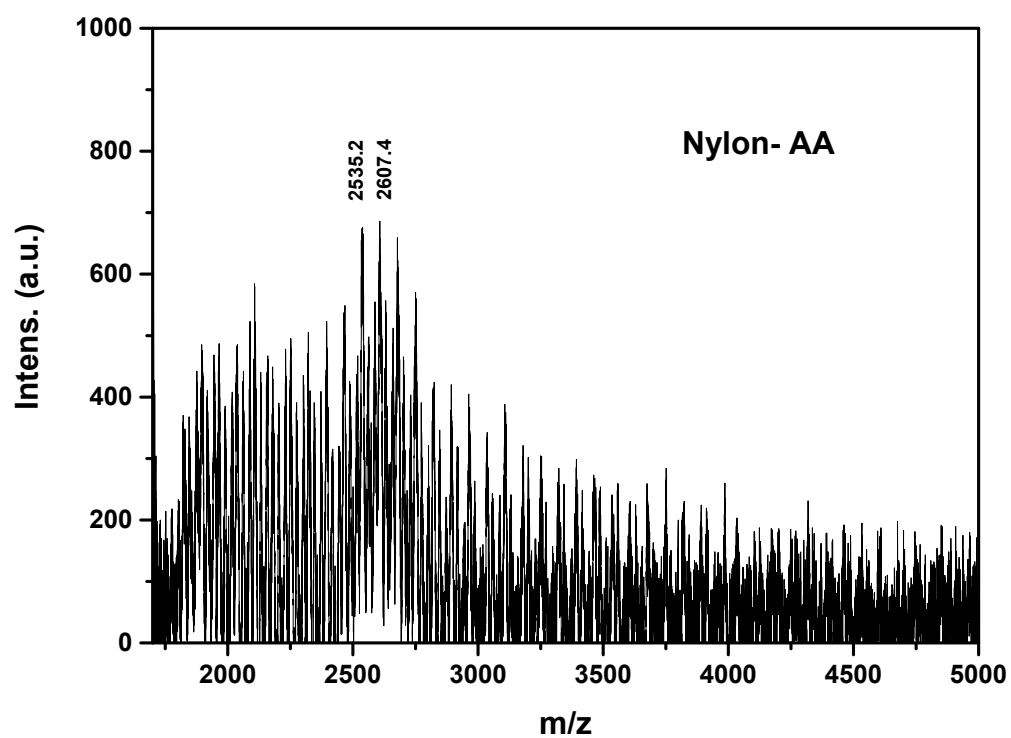

**Fig. S2** Characterization of the molecular weight after grafting PAA determined by MALDI-TOF. The polymer was pull down by H<sup>+</sup> aqueous solution at 100 °C.
